# Supplementary material for: A molecular switch controls interspecies prion disease transmission in mice
Source: JCI journal article supplement (doi:10.1172/jci42051), 2010-06-16
Supplement: sd1 [file 1]

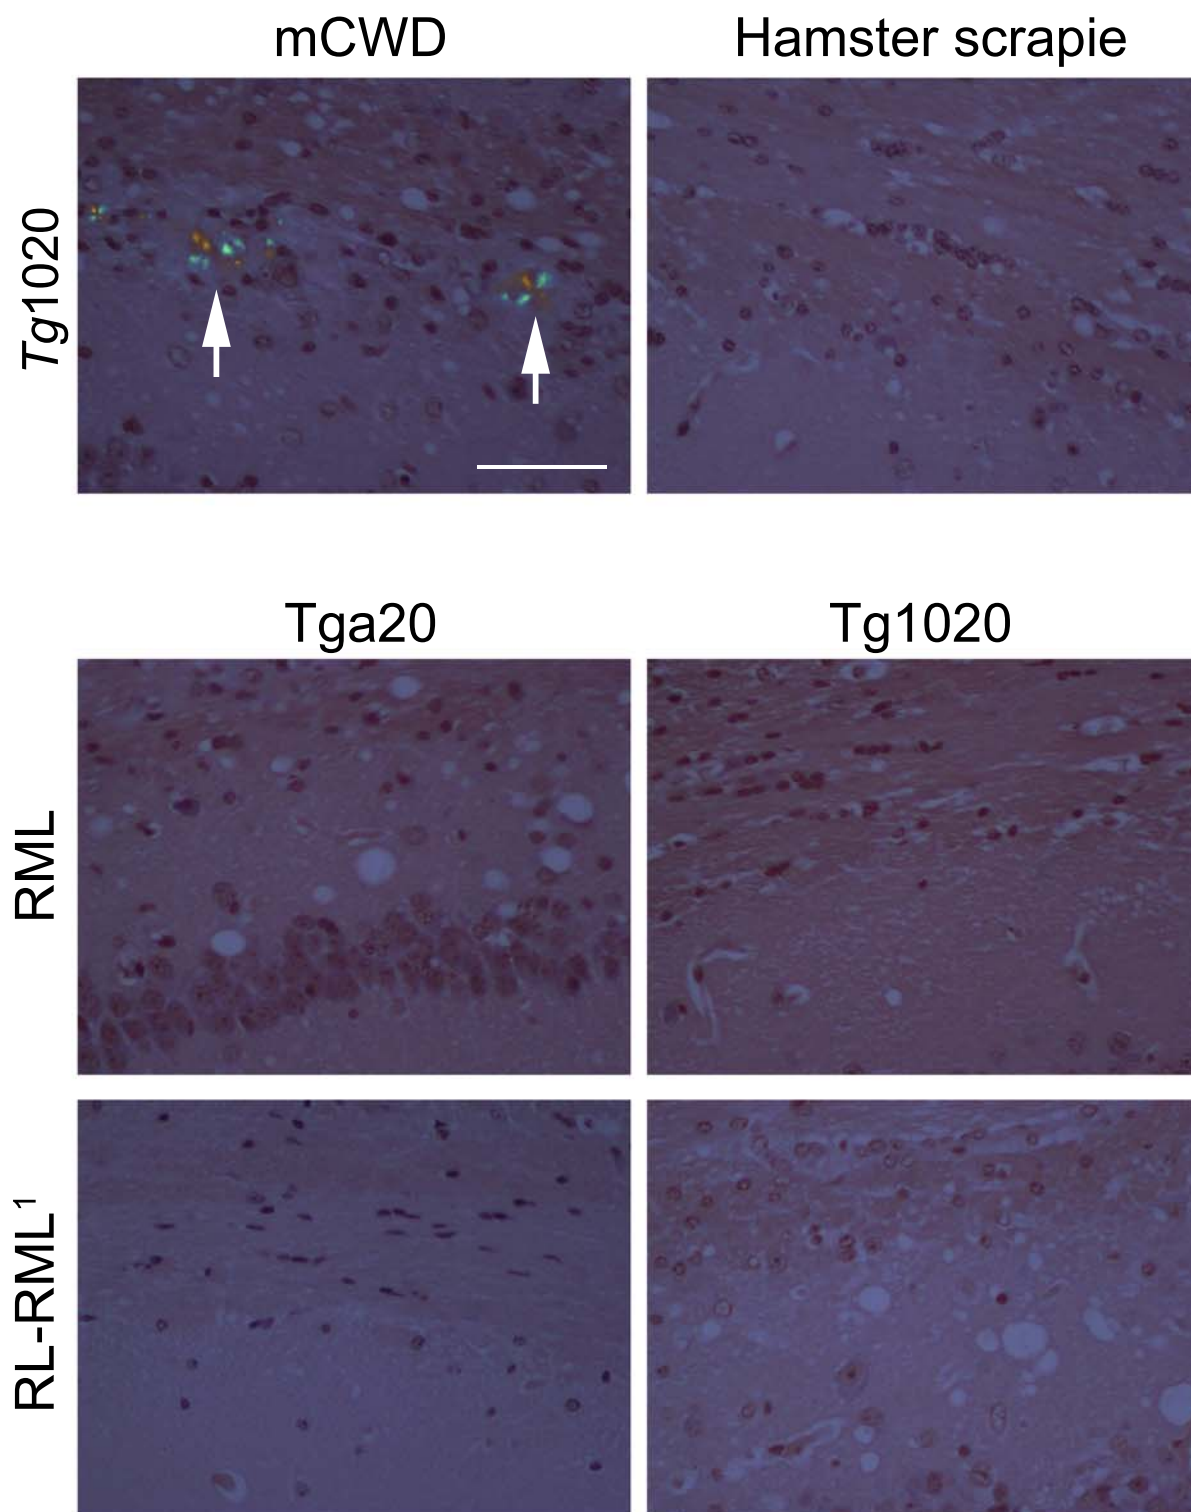

Supplementary figure 1. Congo red stained mCWD plaques are revealed in the brain of *tg1020* mice infected with mCWD, but not after infection with hamster scrapie. Neither RML nor RL-RML<sup>1</sup> infection led to Congo red positive plaques in *tga20* or *tg1020* mice. Bar = 100  $\mu$ m.

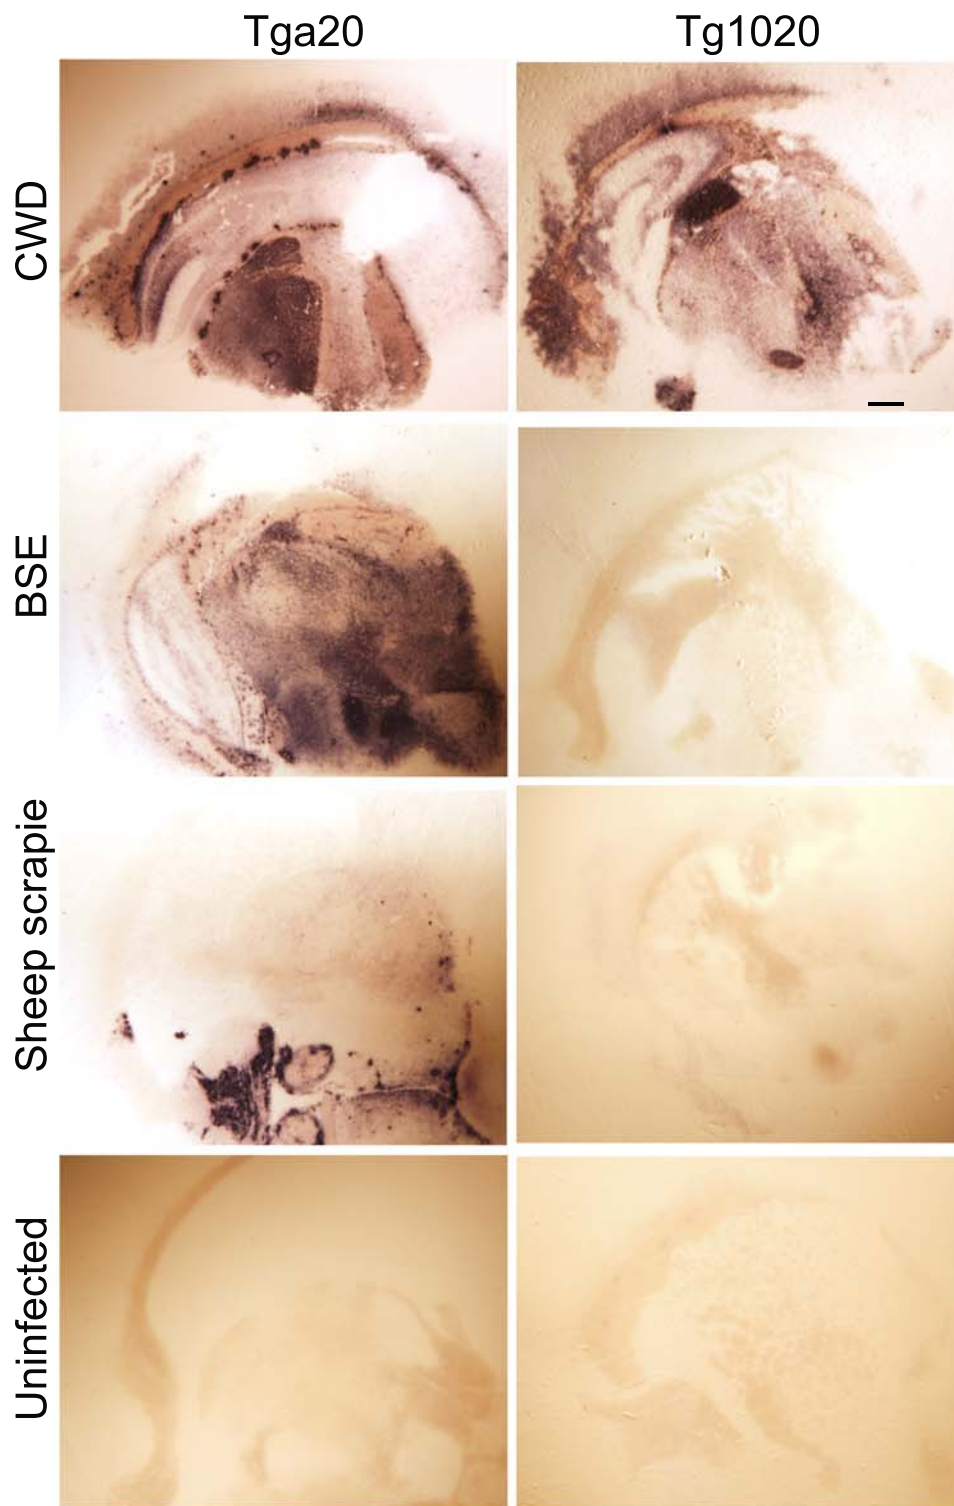

Supplementary figure 2. Histoblots of brain reveal PK-resistant PrP<sup>Sc</sup> in *tg1020* and *tga20* mice infected with deer CWD, as well as *tga20* infected with BSE and sheep scrapie. In contrast, no PK-resistant PrP is detected in brain sections of *tg1020* exposed to BSE, sheep scrapie, or uninfected brain samples. Bar = 1 mm.

PTAA

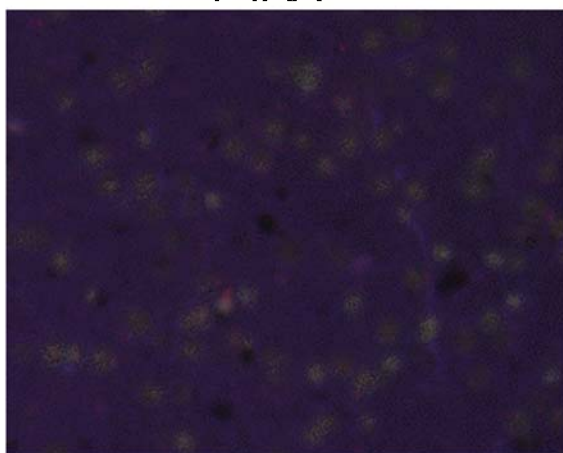

PTMI

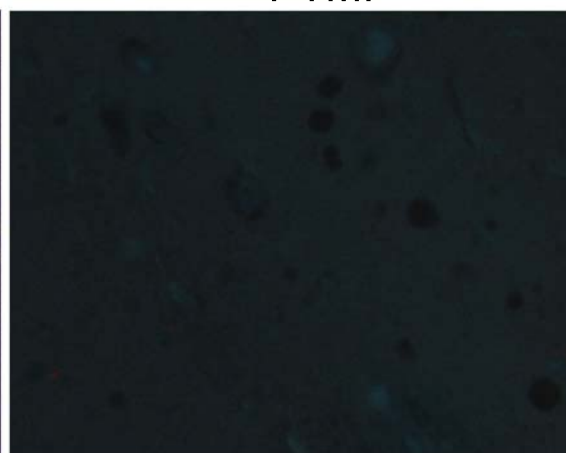

Supplementary figure 3. No PrP aggregates are detected in the brain of *tg1020* mice infected with hamster scrapie using either the PTAA or PTMI fluorescent polymers.

|       | Uninfected<br>tg20 |   | RML | BSE<br>tg1020 |   |   |   | Sheep scrapie<br>tg1020 |   |   |
|-------|--------------------|---|-----|---------------|---|---|---|-------------------------|---|---|
|       | -                  | + | +   | 1             | 2 | 3 | 4 | 1                       | 2 | 3 |
| NaPTA | -                  | + | +   | +             | + | + | + | +                       | + | + |
| PK    | -                  | + | +   | +             | + | + | + | +                       | + | + |

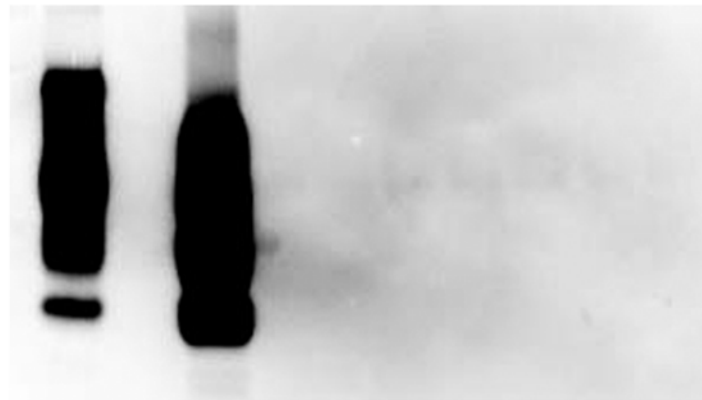

Supplementary figure 4. Western blots show the lack of PK-resistant PrP<sup>Sc</sup> in the brains of *tg1020* mice exposed to either BSE or sheep scrapie.

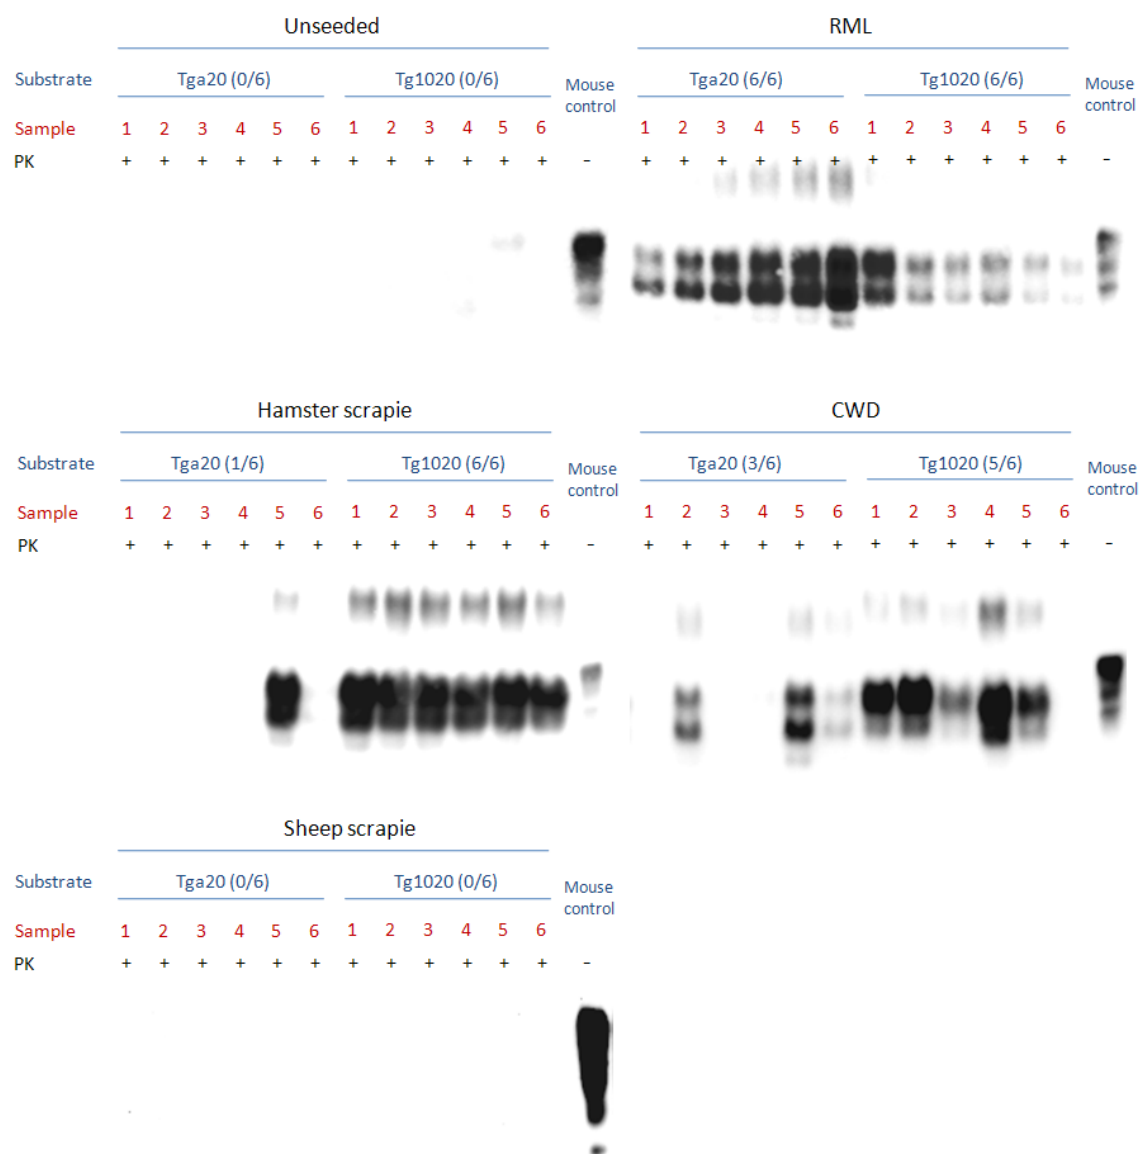

Supplementary figure 5. PK-resistant PrP<sup>Sc</sup> amplified by PMCA is shown by western blot. Six separate samples from each brain homogenate were used in five rounds of PMCA amplification and were either unseeded or seeded with RML, hamster scrapie, CWD, or sheep scrapie.
